# Supplementary material for: KK-LC-1 as a therapeutic target to eliminate ALDH+ stem cells in triple negative breast cancer
Source: Springer Nature journal article supplement (doi:10.1038/s41467-023-38097-1), 2023-05-05
Supplement: MOESM1 [file 41467_2023_38097_MOESM1_ESM.pdf]

## **Supplementary Information**

### **KK-LC-1 as a therapeutic target to eliminate ALDH<sup>+</sup> stem cells in triple negative breast cancer**

**Supplementary Fig. 1**

**Supplementary Fig. 2**

**Supplementary Fig. 3**

**Supplementary Fig. 4**

**Supplementary Fig. 5**

**Supplementary Fig. 6**

**Supplementary Fig. 7**

**Supplementary Fig. 8**

**Supplementary Fig. 9**

**Supplementary Fig. 10**

**Supplementary Fig. 11**

**Supplementary Table 1**

**Supplementary Table 2**

**Supplementary Table 3**

**Supplementary Table 4**

**Supplementary Table 5**

**Supplementary Table 6**



# Supplementary Fig 1

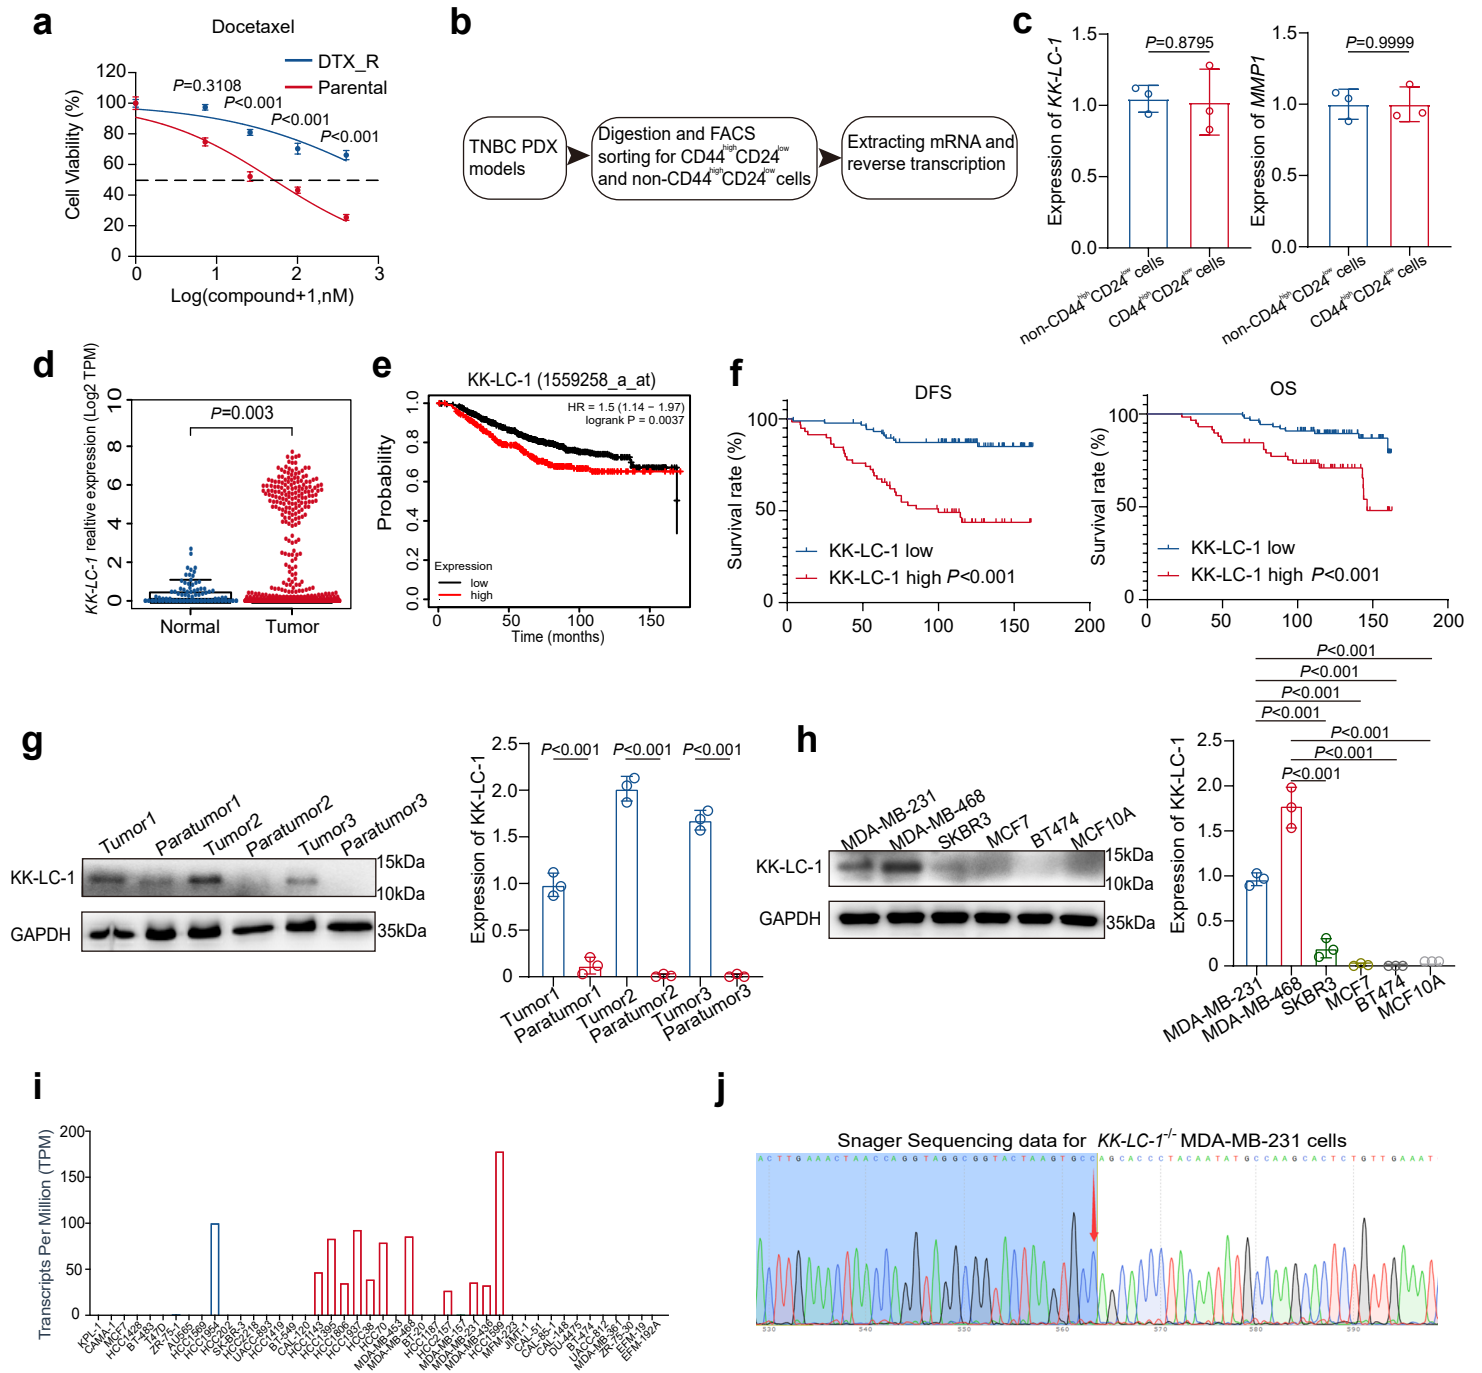

### **Supplementary Fig. 1**

KK-LC-1 is highly expressed in TNBC cancerous tissue and associated with poor prognosis.

**a:** Drug susceptibility test of docetaxel-resistant MDA-MB-231 cells and parental MDA-MB-231 cells to docetaxel; data are presented as mean±SEM from three biologically independent experiments, statistical significance was determined using Student's test and was two sided.

**b:** Schematic showing the identification and isolation of primary CD44<sup>high</sup>CD24<sup>low</sup> and non- CD44<sup>high</sup>CD24<sup>low</sup> cells.

**c:** *KK-LC-1* and *MMP1* showed no significant change in mRNA expression in primary CD44<sup>high</sup>CD24<sup>low</sup> and non-CD44<sup>high</sup>CD24<sup>low</sup> cells; data are presented as mean±SD from three biologically independent experiments, statistical significance was determined using Student's t test and was two sided.

**d:** Expression profile of *KK-LC-1* mRNA in tumor and normal tissues in the TCGA dataset, statistical significance was determined using Student's t test and was two sided.

**e:** Survival analysis of patients with high or low *KK-LC-1* expression in the KM plotter database, statistical significance was determined using log rank test.

**f:** Disease-free survival analysis and overall survival analysis of patients with high or low KK-LC-1 expression in 144 TNBC patients, statistical significance was determined using log rank test.

**g:** Western blotting showing KK-LC-1 protein levels in TNBC tumor and para-tumor tissue samples; data are presented as mean±SD from three biologically independent experiments, statistical significance was determined using Student's t test and was two sided.

**h:** Western blotting showing KK-LC-1 protein levels in the MDA-MB-231, MDA-MB-468, SKBR3, MCF7, BT474 and MCF10A cell lines; data are presented as mean±SD from three biologically independent experiments, statistical significance was determined using Student's t test and was two sided.

**i:** Expression of *KK-LC-1* mRNA in multiple breast cancer cell lines.

**j:** Sanger sequencing data for *KK-LC-1*<sup>-/-</sup> MDA-MB-231 cells.

Source data are provided in the Source Data file.

**Supplementary Fig 2**

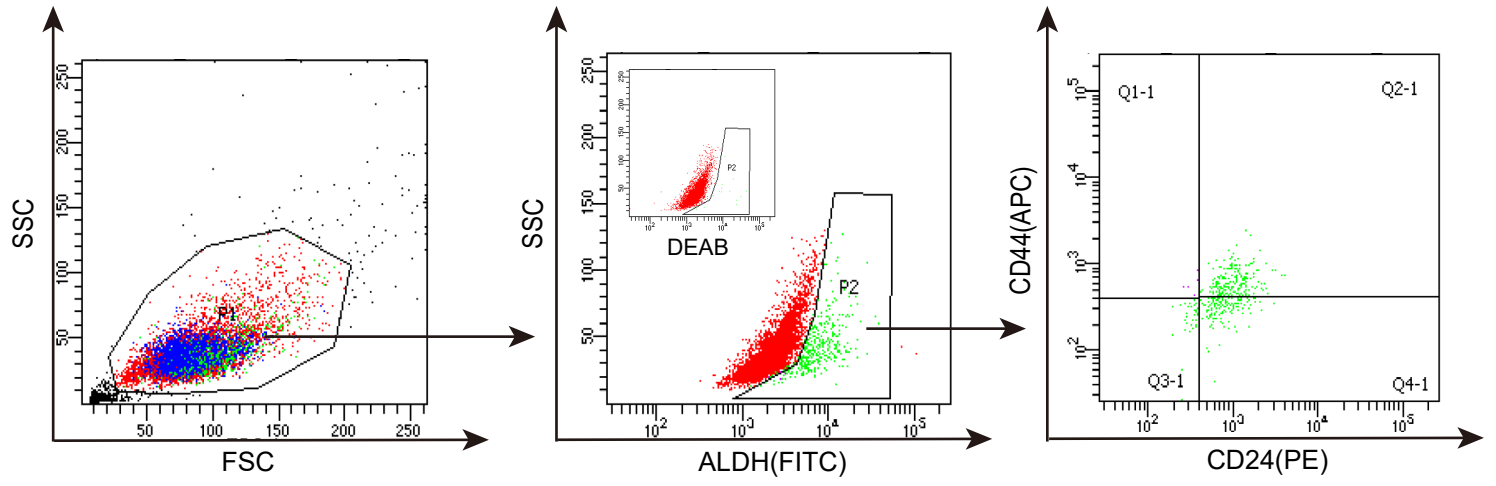

## Supplementary Fig 2

Figure exemplifying the gating strategy in flow cytometry.

Gating strategy: cells were first gated using FSC and SSC, the dead cells which separated from the major population was removed in this step. Further on, cells from P1 were tested for ALDH activity. The vertical axis was SSC and the horizontal axis was ALDH-FITC. Cells with higher ALDH signal than the DEAB group was defined as ALDH<sup>+</sup> population which were in the gate of P2. After which, the ALDH<sup>+</sup> population was again gated by CD44 and CD24. The vertical axis was CD44-APC and the horizontal axis was CD24-PE. Cells with higher CD44 signal than the cells stained by isotype IgG were defined as CD44<sup>high</sup>, so was the detection of CD24. The cells in Q1-1 were CD44<sup>high</sup>CD24<sup>low</sup>ALDH<sup>+</sup> cells.

# Supplementary Fig 3

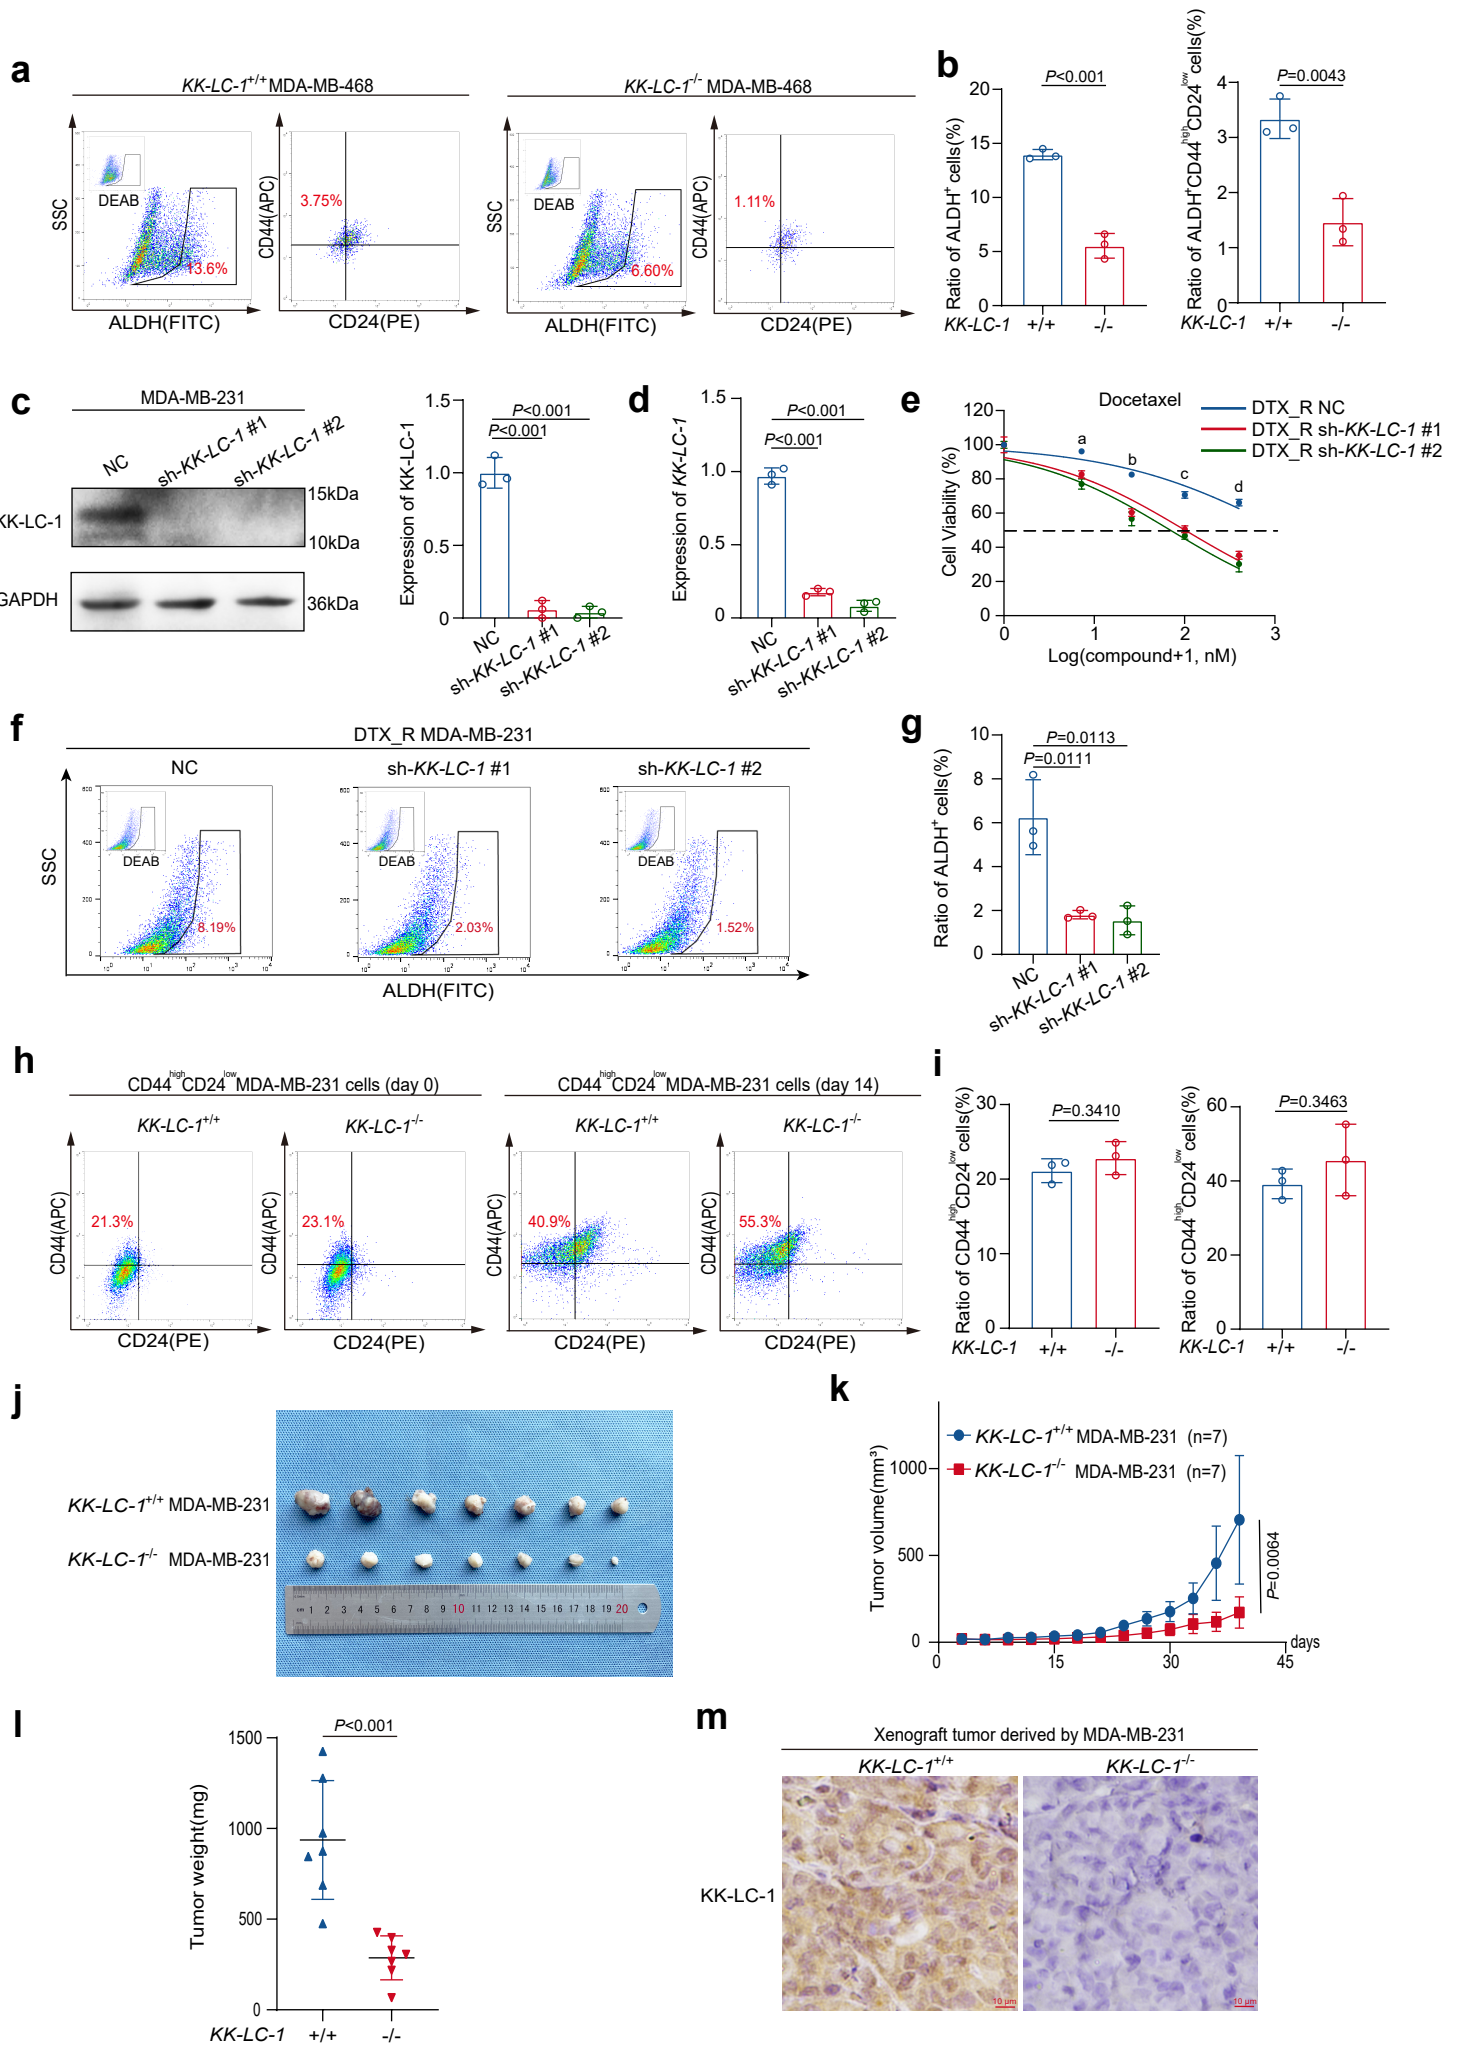

### Supplementary Fig 3

KK-LC-1 is associated with drug resistance ability and ALDH<sup>+</sup> cell ratio in DTX\_R cells.

**a,b:** Proportion of ALDH<sup>+</sup> cells and ALDH<sup>+</sup>CD44<sup>high</sup>CD24<sup>low</sup> cells in *KK-LC-I*<sup>-/-</sup> MDA-MB-468 cells and *KK-LC-I*<sup>+/+</sup> MDA-MB-468 cells; data are presented as mean±SD from three biologically independent experiments, statistical significance was determined using Student's t test and was two sided.

**c:** Lentivirus efficacy verified by Western blotting; data are presented as mean±SD from three biologically independent experiments, statistical significance was determined using Student's t test and was two sided.

**d:** Lentivirus efficacy verified by qRT-PCR analysis; data are presented as mean±SD from three biologically independent experiments, statistical significance was determined using Student's t test and was two sided.

**e:** Drug susceptibility test of docetaxel-resistant MDA-MB-231 cells transduced with sh-*KK-LC-I*#1, sh-*KK-LC-I*#2 and negative control (NC) lentivirus; data are presented as mean±SEM from three biologically independent experiments, 'a' indicates  $P=0.0075$  when DTX\_R sh-*KK-LC-I*#1 compared to DTX\_R NC and  $P=0.0015$  when DTX\_R sh-*KK-LC-I*#2 compared to DTX\_R NC treated by 6.25 nM docetaxel, 'b' indicates  $P=0.0014$  when DTX\_R sh-*KK-LC-I*#1 compared to DTX\_R NC and  $P<0.001$  when DTX\_R sh-*KK-LC-I*#2 compared to DTX\_R NC treated by 25 nM docetaxel, 'c' indicates  $P=0.0002$  when DTX\_R sh-*KK-LC-I*#1 compared to DTX\_R NC and  $P<0.001$  when DTX\_R sh-*KK-LC-I*#2 compared to DTX\_R NC treated by 100 nM docetaxel, 'd' indicates  $P<0.001$  when DTX\_R sh-*KK-LC-I*#1 compared to DTX\_R NC and  $P<0.001$  when DTX\_R sh-*KK-LC-I*#2 compared to DTX\_R NC treated by 400 nM docetaxel, statistical significance was determined using Student's t test and was two sided.

**f,g:** Proportion of ALDH<sup>+</sup> cells in docetaxel-resistant MDA-MB-231 cells transduced with sh-*KK-LC-I*#1, sh-*KK-LC-I*#2 and negative control (NC) lentivirus; data are presented as mean±SD from three biologically independent experiments, statistical significance was determined using Student's t test and was two sided.

**h,i:** Proportion of CD44<sup>high</sup>CD24<sup>low</sup> cells in *KK-LC-I<sup>-/-</sup>* MDA-MB-231 cells and *KK-LC-I<sup>+/+</sup>* MDA-MB-231 cells in day 0 and day 14; data are presented as mean±SD from three biologically independent experiments, statistical significance was determined using Student's t test and was two sided.

**j:** Size of tumors formed by *KK-LC-I<sup>-/-</sup>* MDA-MB-231 cells and *KK-LC-I<sup>+/+</sup>* MDA-MB-231 cells in xenograft mouse models, n=7 mice.

**k:** Volume of tumors formed by *KK-LC-I<sup>-/-</sup>* MDA-MB-231 cells and *KK-LC-I<sup>+/+</sup>* MDA-MB-231 cells in xenograft mouse models; data are presented as mean±SD, n=7 mice for each group, statistical significance was determined using Student's t test and was two sided.

**l:** Weight of tumors formed by *KK-LC-I<sup>-/-</sup>* MDA-MB-231 cells and *KK-LC-I<sup>+/+</sup>* MDA-MB-231 cells in xenograft mouse models; data are presented as mean±SD, n=7 mice for each group, statistical significance was determined using Student's t test and was two sided.

**m:** Immunohistochemistry staining showing KK-LC-1 protein expression in tumors derived from *KK-LC-I<sup>-/-</sup>* MDA-MB-231 cells and *KK-LC-I<sup>+/+</sup>* MDA-MB-231 cells in xenograft mouse models, red scale bars indicate 10 µm. This experiment was performed 3 times independently with similar results.

Source data are provided in the Source Data file.



# Supplementary Fig 4

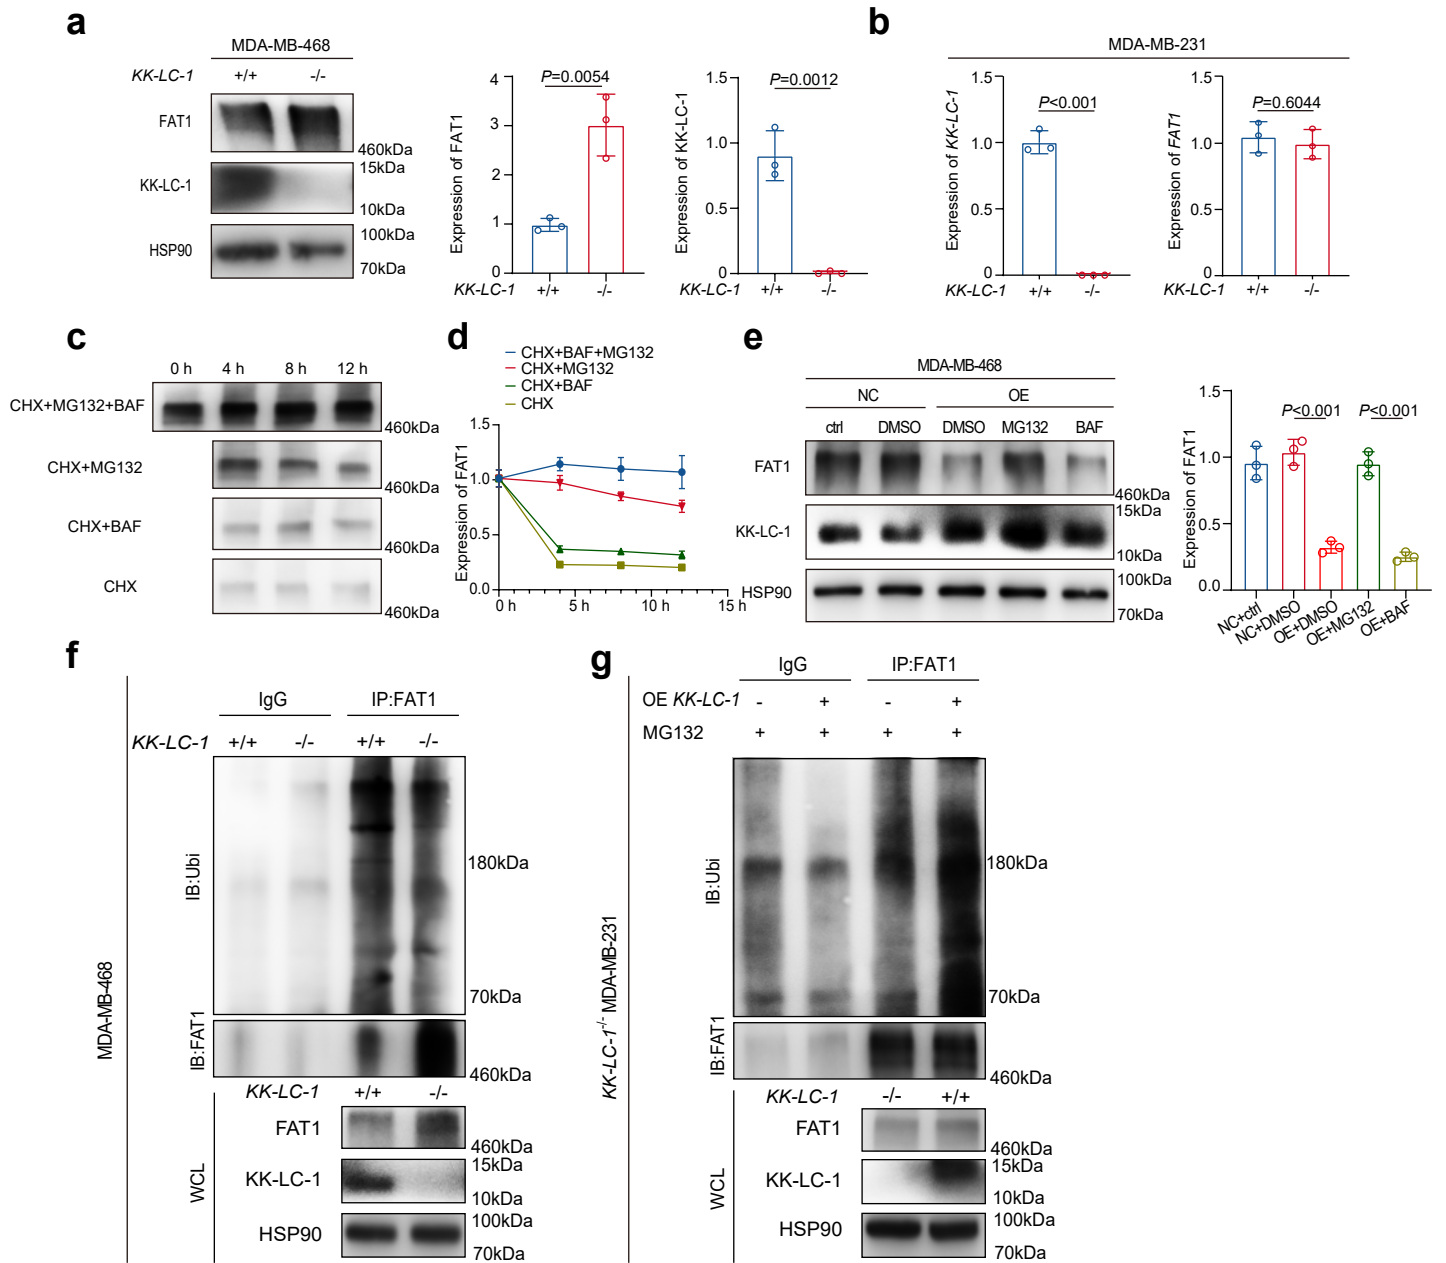

#### Supplementary Fig 4

KK-LC-1 regulates FAT1 at protein level and affects the ubiquitination of FAT1.

**a:** Western blotting showing FAT1 and KK-LC-1 protein levels in *KK-LC-1<sup>-/-</sup>* MDA-MB-468 cells and *KK-LC-1<sup>+/+</sup>* MDA-MB-468 cells; data are presented as mean±SD from three biologically independent experiments, statistical significance was determined using Student's t test and was two sided.

**b:** qRT-PCR showing the relative expression of *FAT1* and *KK-LC-1* mRNA in *KK-LC-1<sup>-/-</sup>* MDA-MB-231 cells and *KK-LC-1<sup>+/+</sup>* MDA-MB-231 cells; data are presented as mean±SD from three biologically independent experiments, statistical significance was determined using Student's t test and was two sided.

**c,d:** Western blotting showing FAT1 protein levels in MDA-MB-231 cells treated with different combinations of cycloheximide, MG132 and bafilomycin at different time points; data are presented as mean±SD from three biologically independent experiments.

**e:** Western blotting showing FAT1 protein levels in MDA-MB-468 cells over expressing KK-LC-1 treated with MG132 and bafilomycin; data are presented as mean±SD from three biologically independent experiments, statistical significance was determined using Student's t test and was two sided.

**f:** Immunoprecipitation showing ubiquitination of FAT1 protein in *KK-LC-1<sup>-/-</sup>* MDA-MB-468 cells and *KK-LC-1<sup>+/+</sup>* MDA-MB-468 cells, this experiment was performed 3 times independently with similar results.

**g:** Immunoprecipitation showing ubiquitination of FAT1 protein in *KK-LC-1<sup>-/-</sup>* MDA-MB-231 cells over expressing KK-LC-1 and NC, this experiment was performed 3 times independently with similar results.

Source data are provided in the Source Data file.

# Supplementary Fig 5

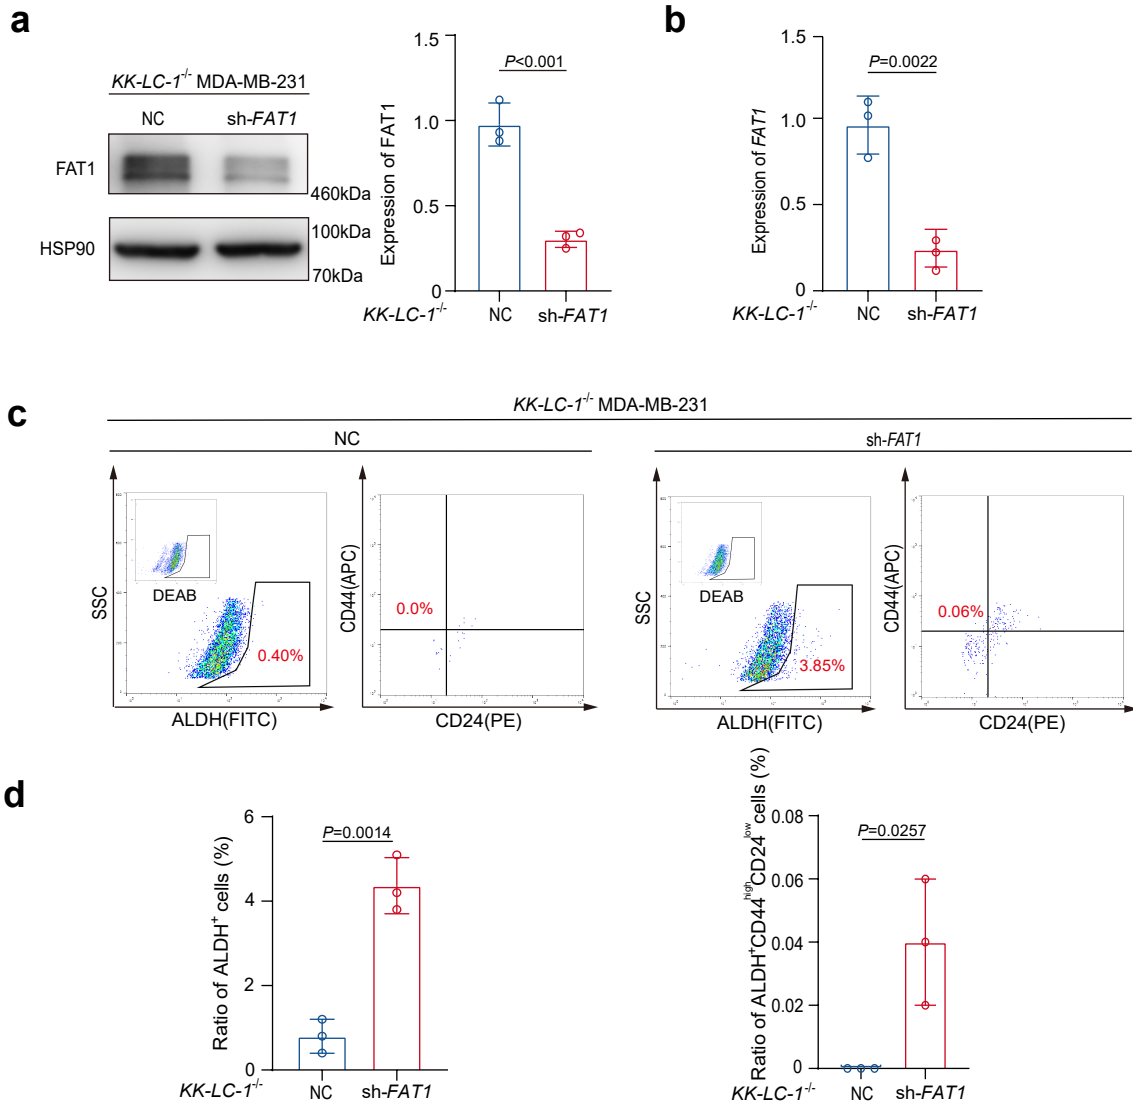

### Supplementary Fig 5

Knock down of *FAT1* restores ALDH<sup>+</sup> cell ratio in *KK-LC-I<sup>-/-</sup>* MDA-MB-231 cells.

**a:** Lentivirus efficacy verified by western blot analysis; data are presented as mean±SD from three biologically independent experiments, statistical significance was determined using Student's t test and was two sided.

**b:** Lentivirus efficacy verified by qRT-PCR analysis; data are presented as mean±SD from three biologically independent experiments, statistical significance was determined using Student's t test and was two sided.

**c,d:** Proportion of ALDH<sup>+</sup> cells and ALDH<sup>+</sup>CD44<sup>high</sup>CD24<sup>low</sup> cells in *KK-LC-I<sup>-/-</sup>* MDA-MB-231 cells transfected with sh-NC and *KK-LC-I<sup>-/-</sup>* MDA-MB-231 cells transfected with sh-*FAT1*; data are presented as mean±SD from three biologically independent experiments, statistical significance was determined using Student's t test and was two sided.

Source data are provided in the Source Data file.

# Supplementary Fig 6

**a**

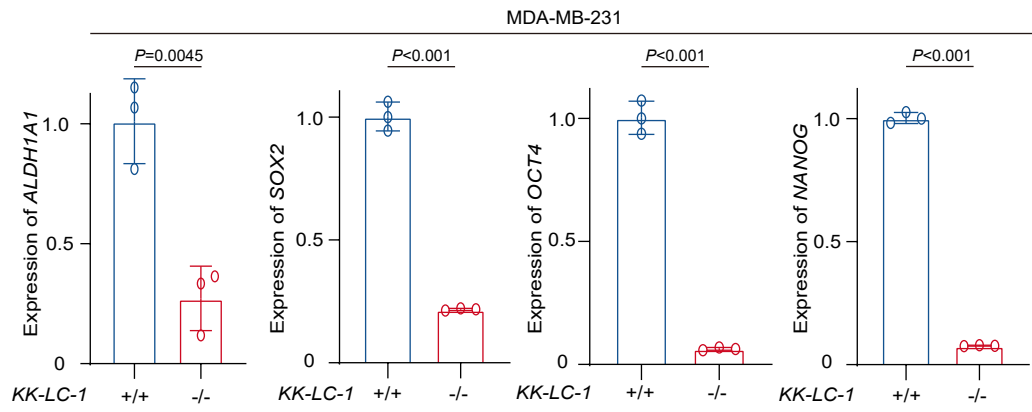

**b**

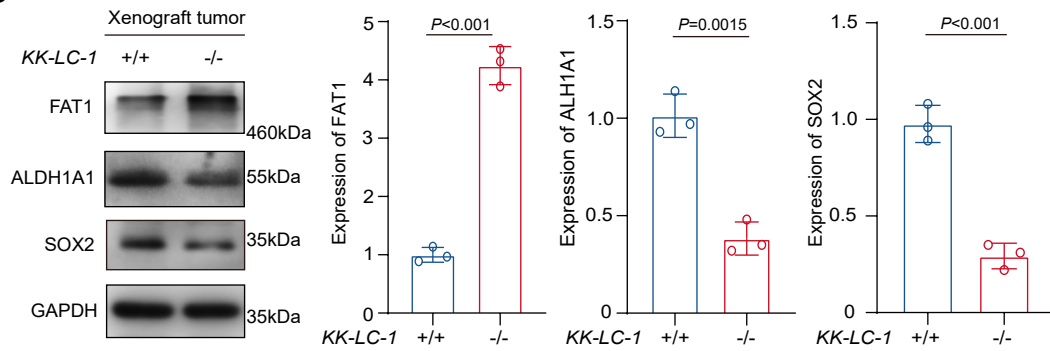

### Supplementary Fig 6

KK-LC-1 regulates the expression of canonical stemness transcription factors.

**a:** *ALDH1A1*, *SOX2*, *OCT4* and *NANOG* mRNA levels in *KK-LC-I<sup>-/-</sup>* MDA-MB-231 cells and *KK-LC-I<sup>+/+</sup>* MDA-MB-231 cells; data are presented as mean±SD from three biologically independent experiments, statistical significance was determined using Student's t test and was two sided.

**b:** Western blotting showing FAT1, ALDH1A1 and SOX2 expression in xenograft tumors formed by *KK-LC-I<sup>-/-</sup>* MDA-MB-231 cells and *KK-LC-I<sup>+/+</sup>* MDA-MB-231 cells; data are presented as mean±SD from three biologically independent experiments, statistical significance was determined using Student's t test and was two sided.

Source data are provided in the Source Data file.

# Supplementary Fig 7

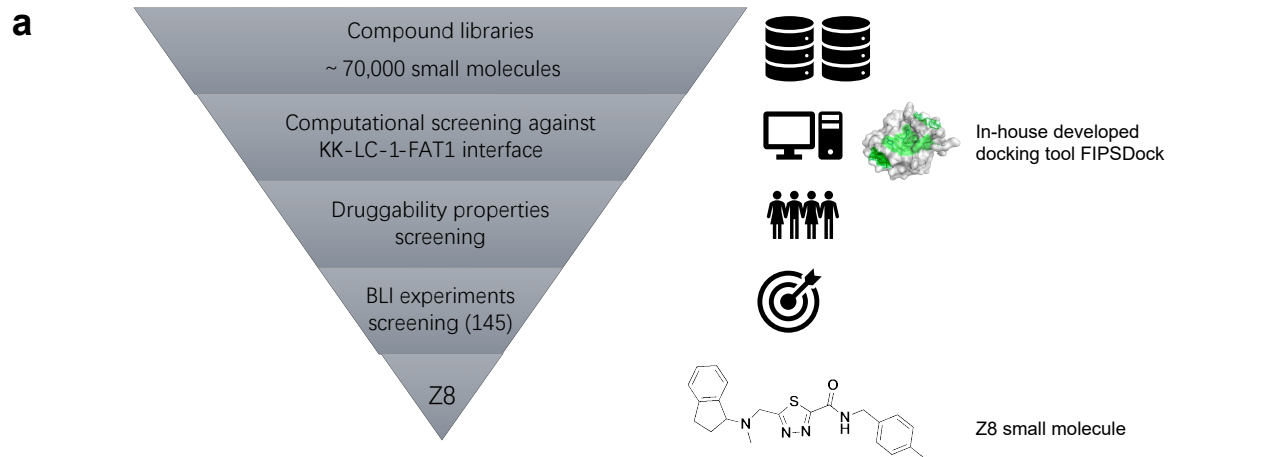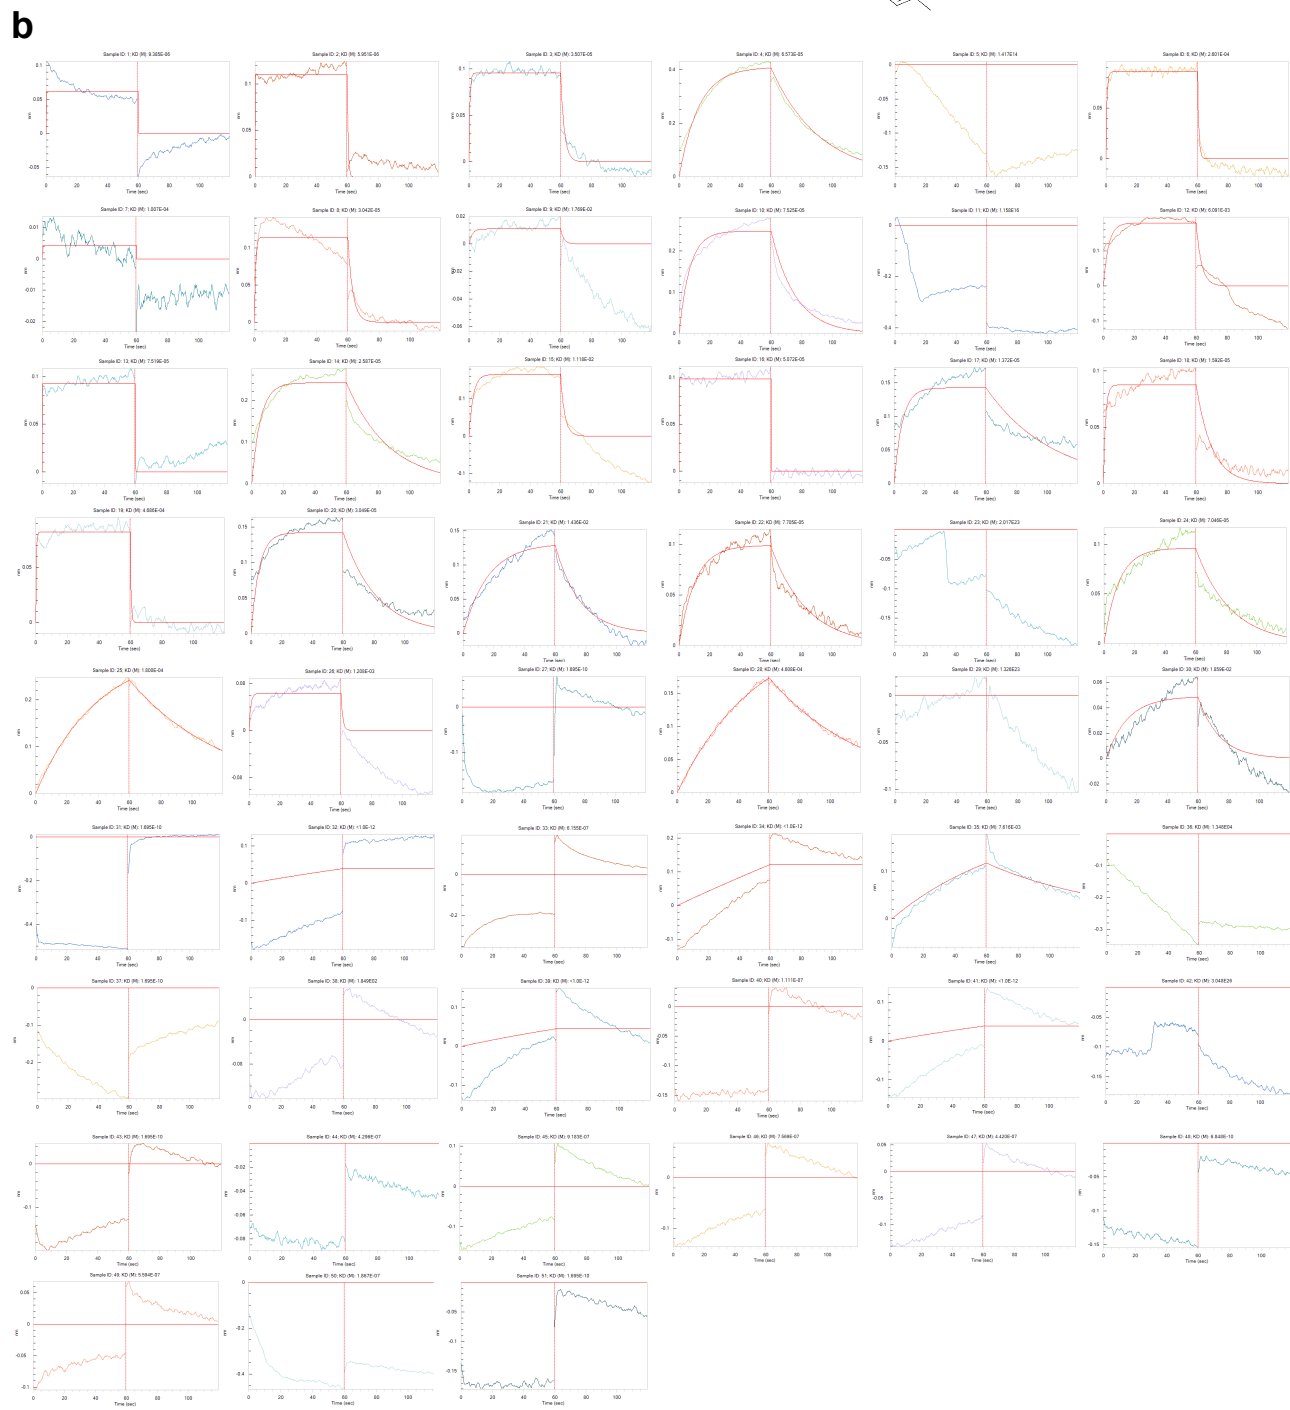

### **Supplementary Fig 7**

Screening of small molecules which could bind with KK-LC-1.

**a:** Schematic depicting the selecting of small molecule of Z8.

**b:** Association-dissociation curves for binding of a single concentration of small molecule compounds to KK-LC-1 protein.



# Supplementary Fig 8

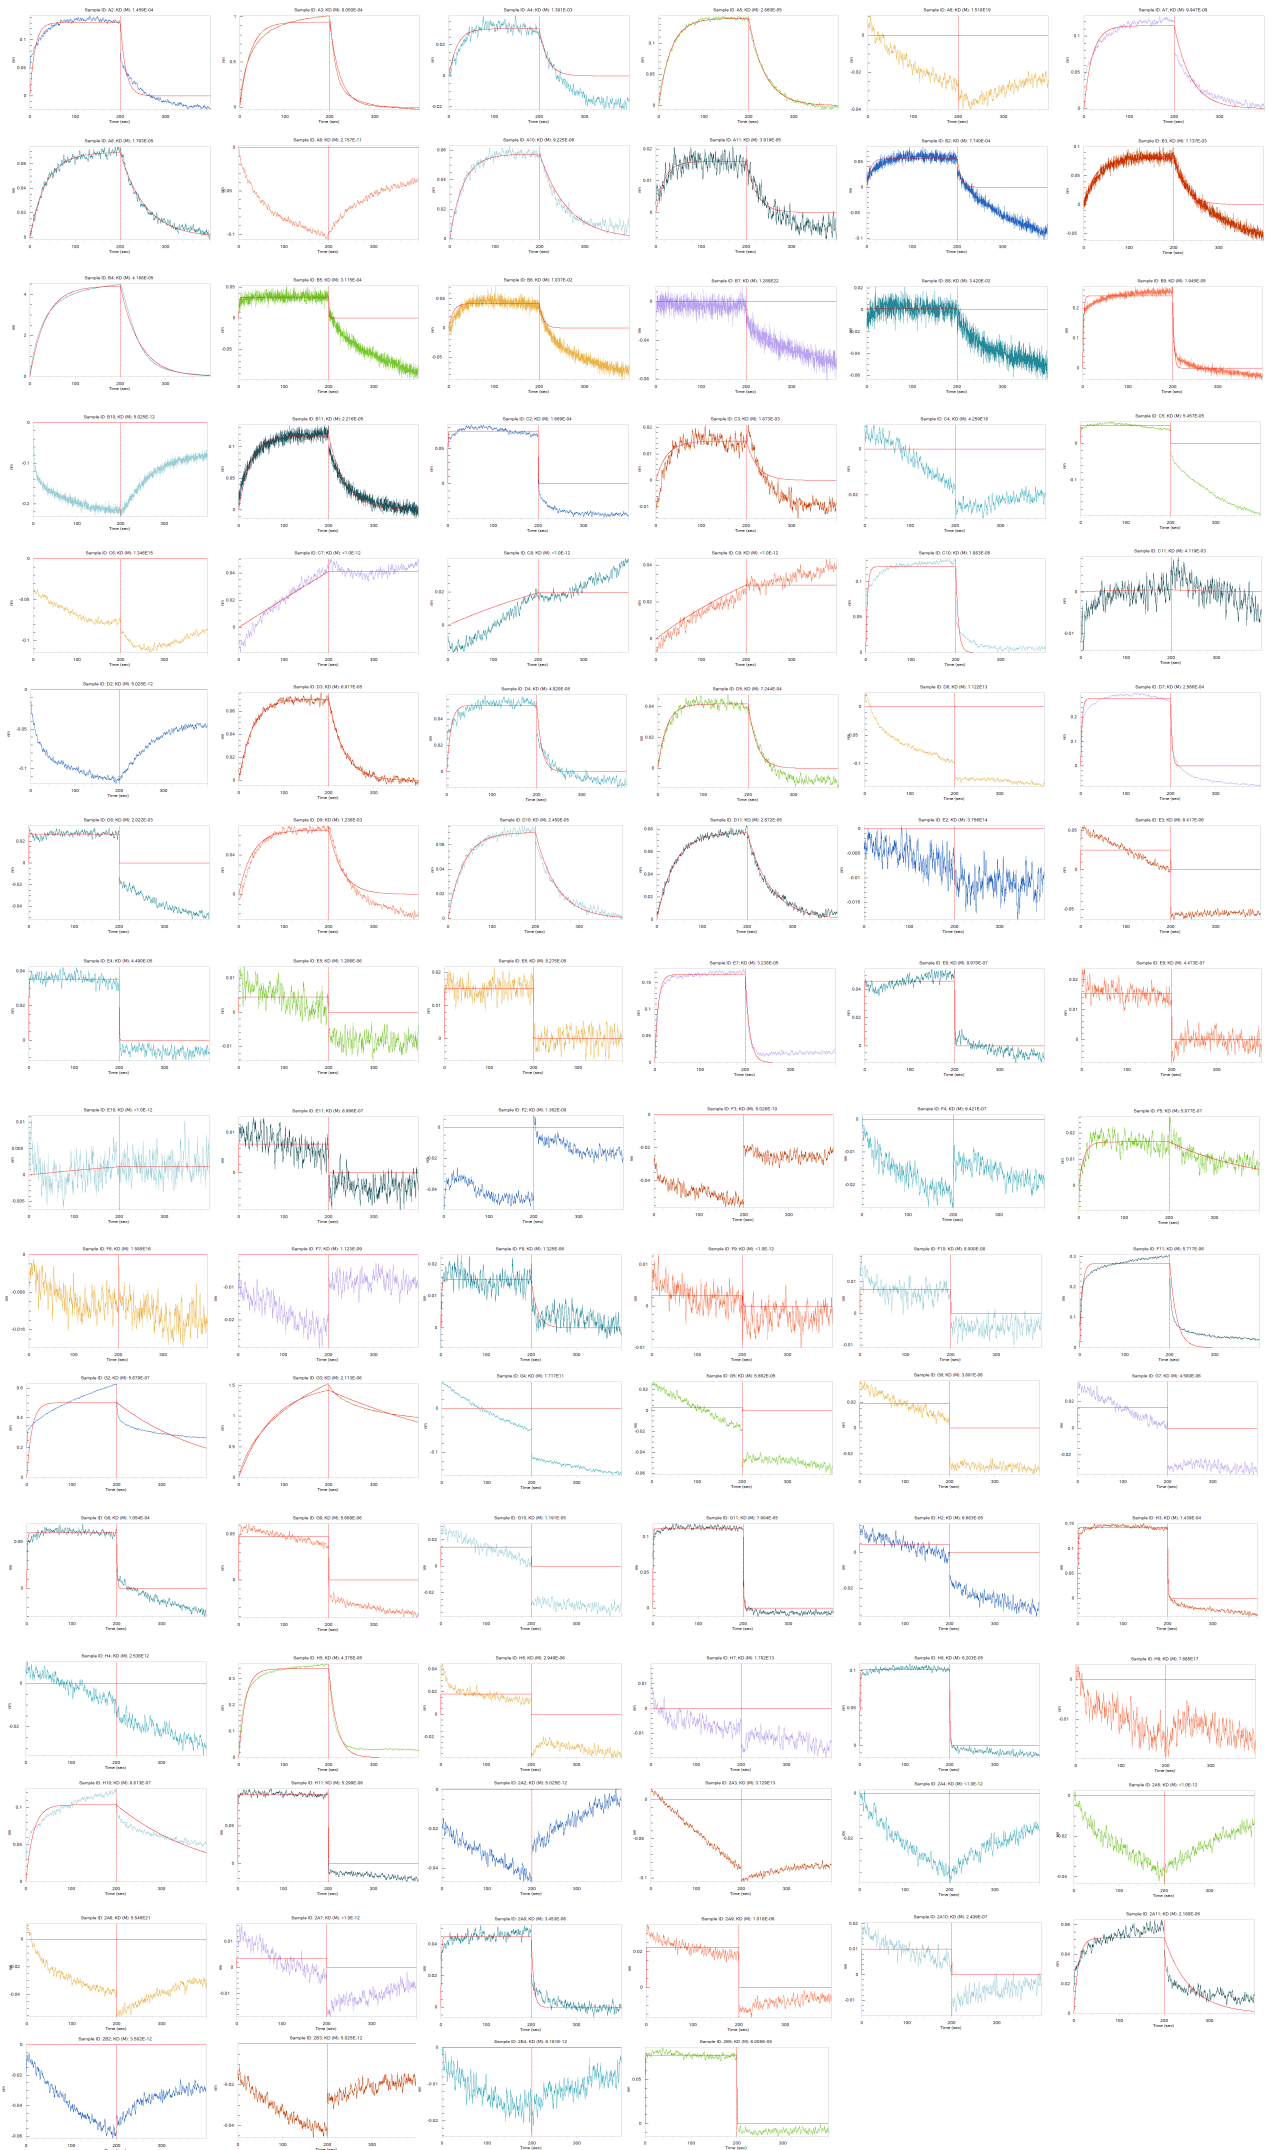

### **Supplementary Fig 8**

Screening of small molecules which could bind with KK-LC-1.

Association-dissociation curves for binding of a single concentration of small molecule compounds to KK-LC-1 protein.

# Supplementary Fig 9

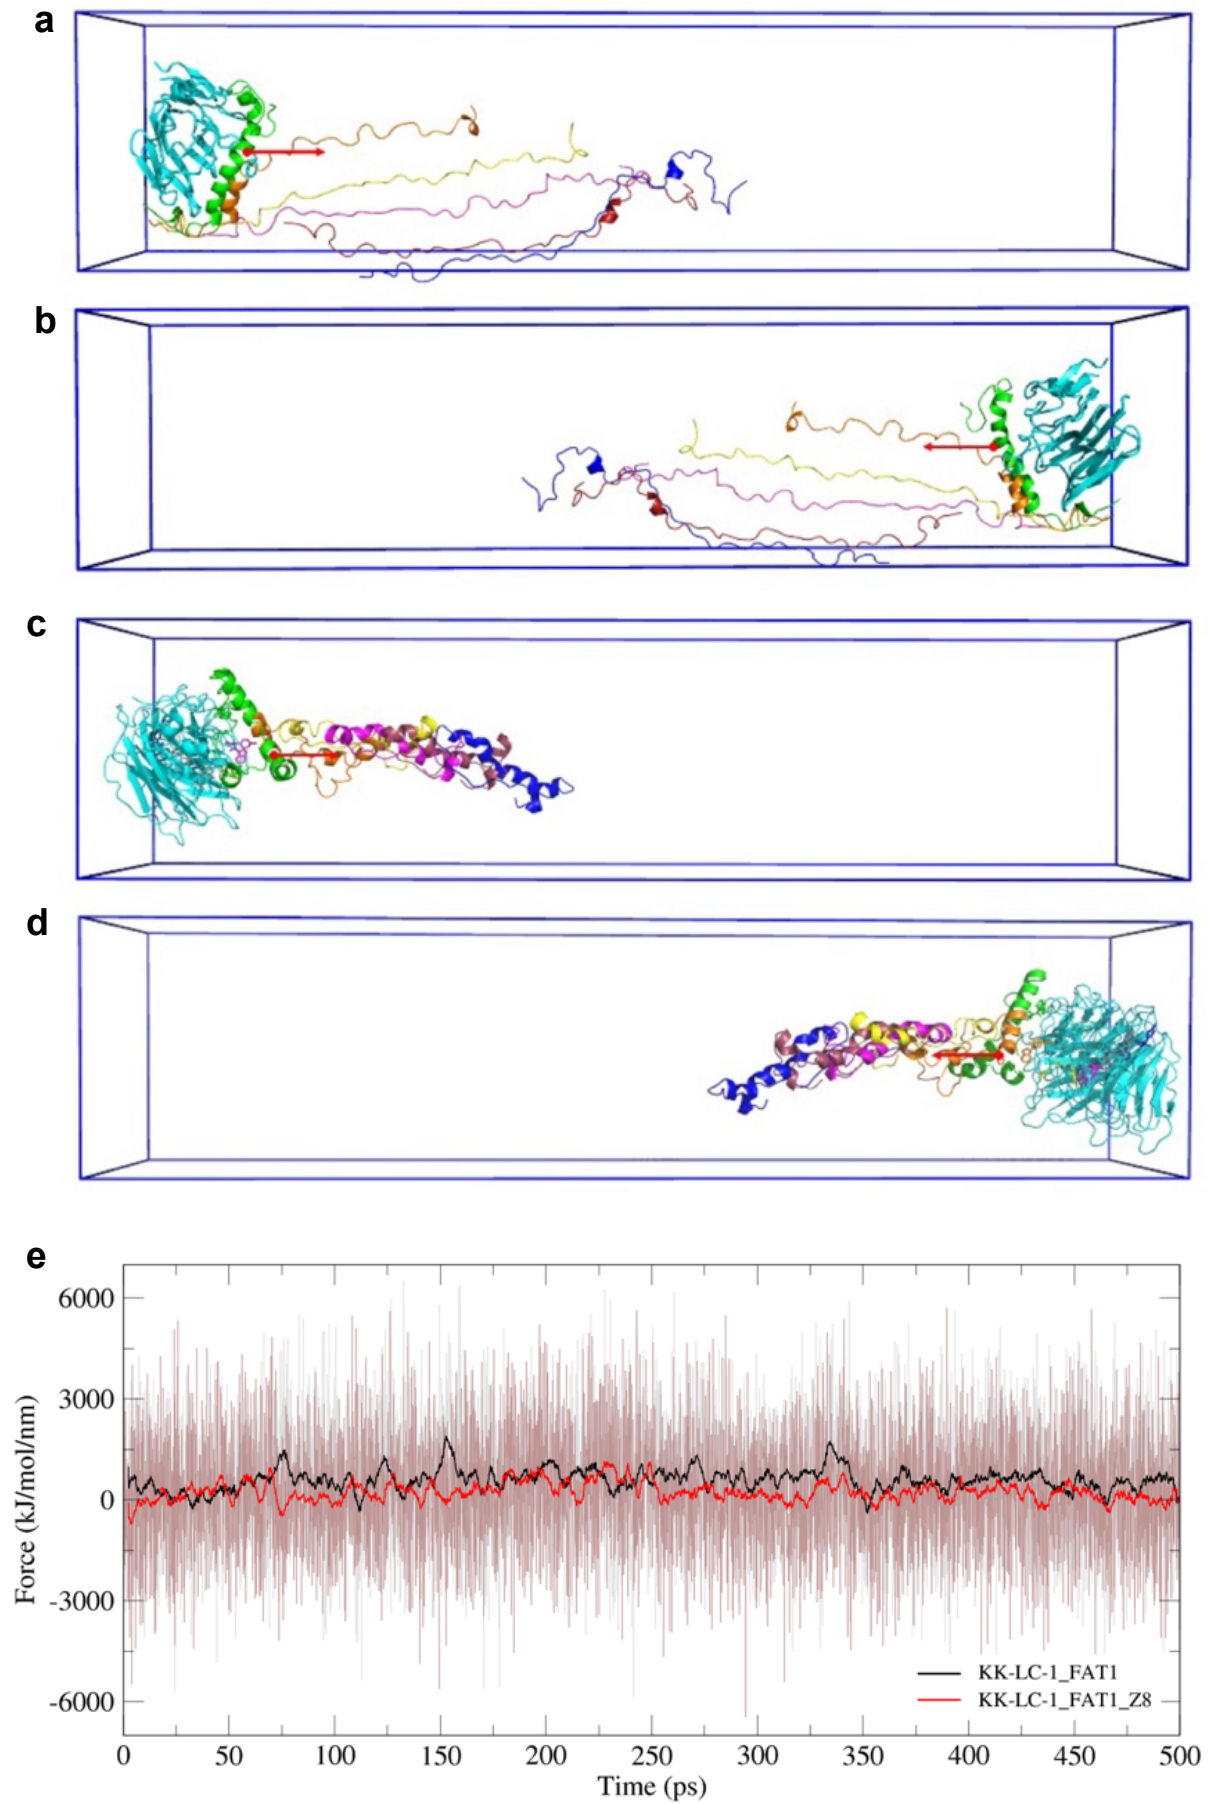

### **Supplementary Fig 9**

Steered Molecular Dynamics (SMD) simulations on KK-LC-1-Z8-FAT1 complex.

**a-b:** Structure comparisons of KK-LC1-FAT1 system during the 1 ns SMD simulations.

**c-d:** Structure comparisons of Z839878730-KK-LC1-Laminin G triple system during the 1 ns SMD simulations. Cyan cartoon structure represents FAT1 conformations. Green, orange, yellow, magenta, raspberry and blue cartoon structure represent KK-LC-1 for the conformation at 0 ps, 200 ps, 400ps, 600 ps, 800ps and 1000ps.

**e:** Time dependence of rupture forces between the KK-LC-1 and FAT1 during SMD simulations.

# Supplementary Fig 10

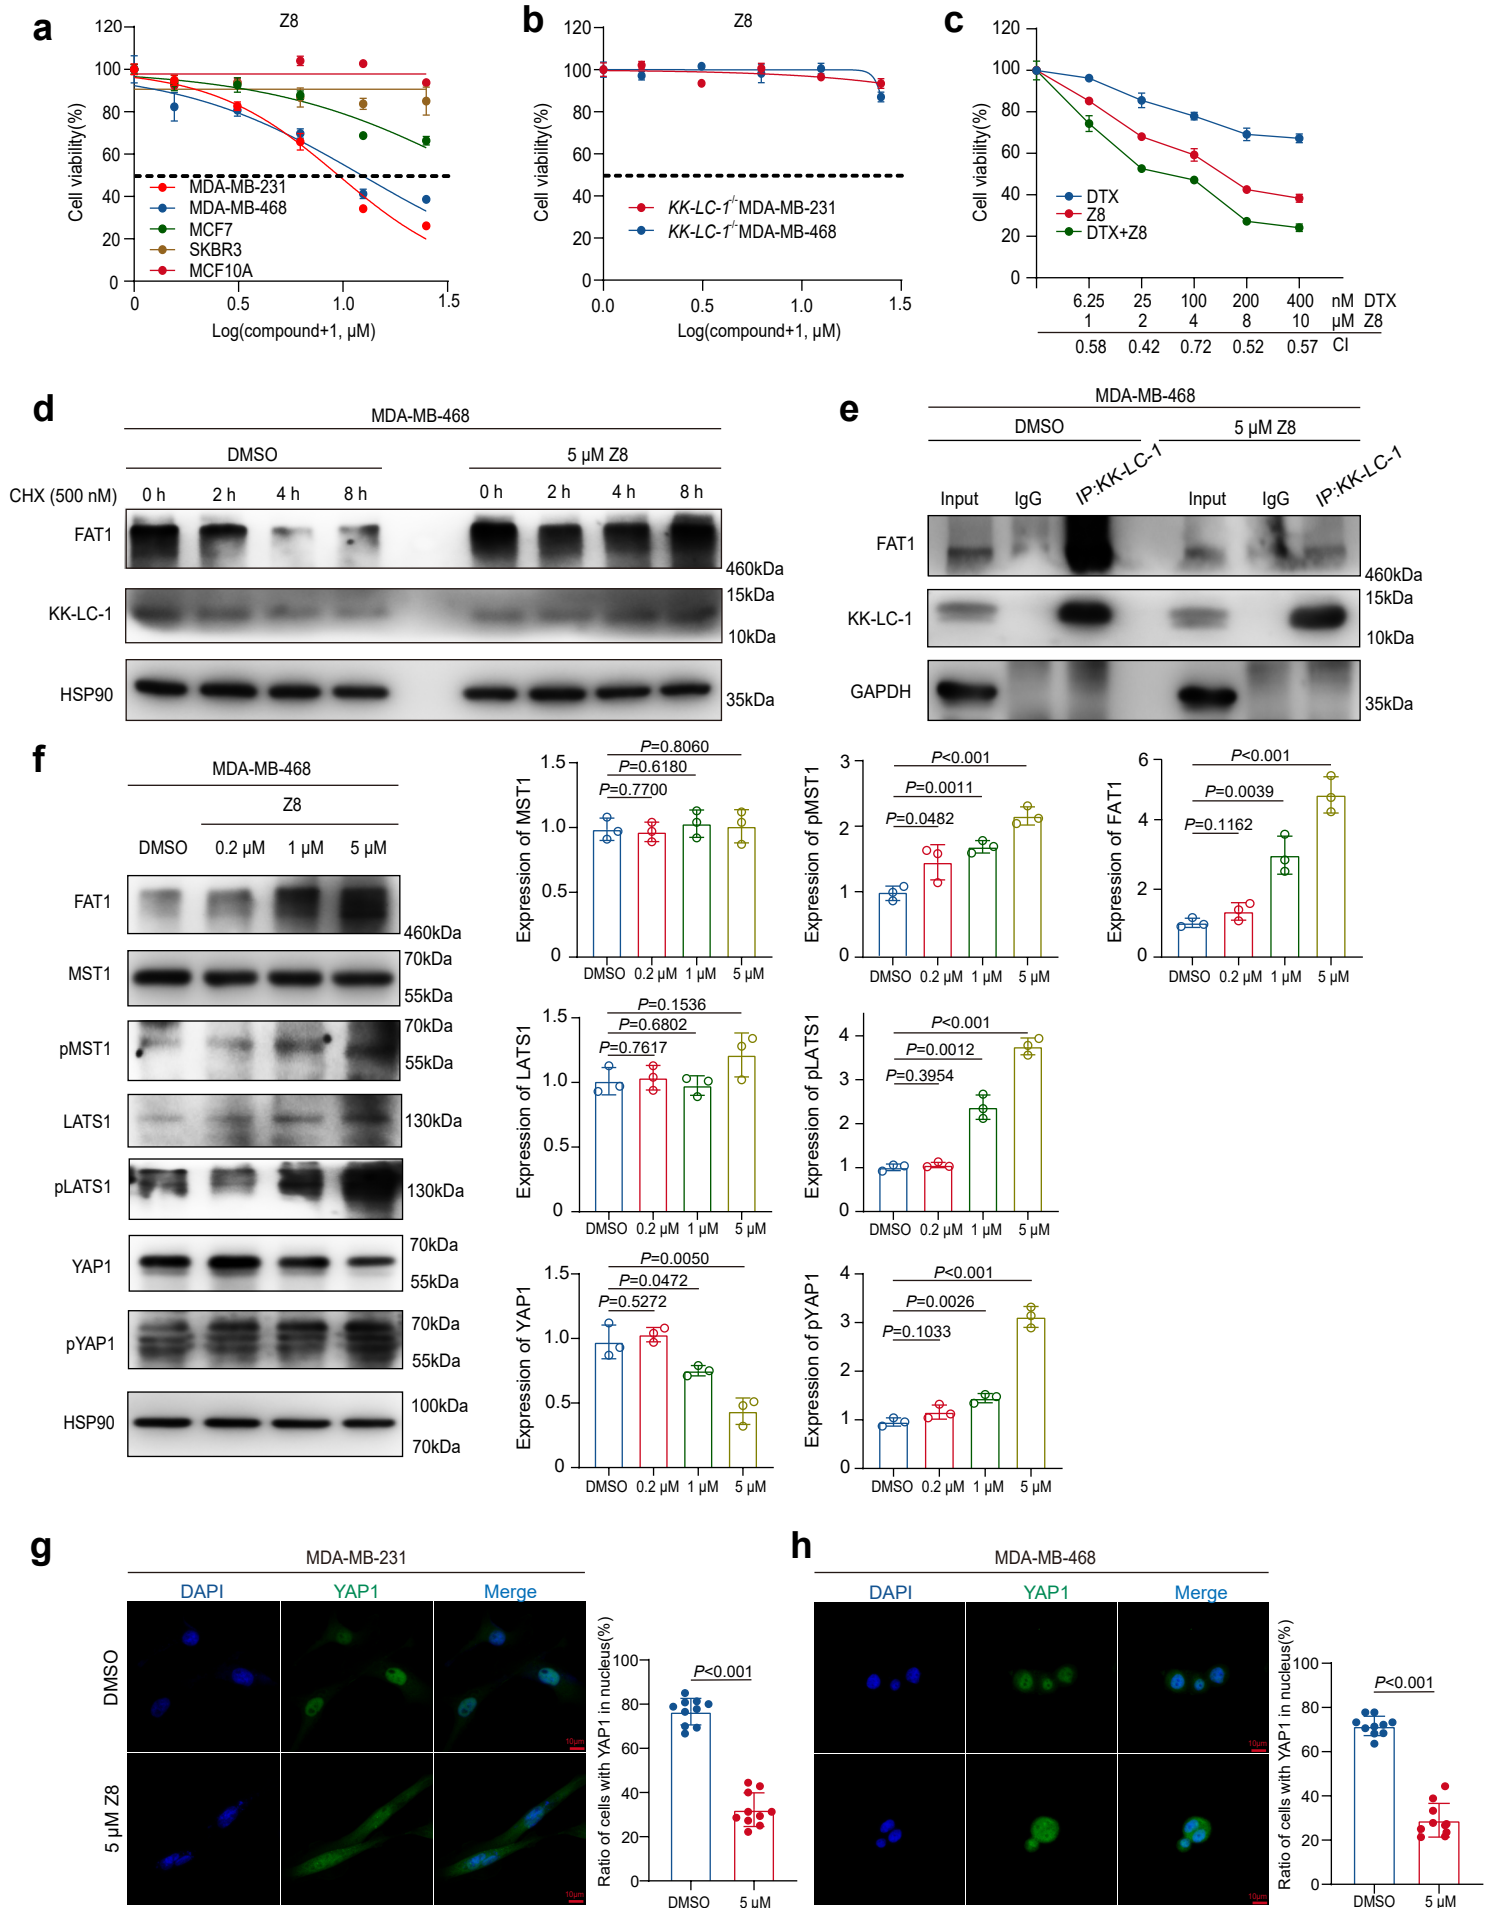

### Supplementary Fig 10

Z839878730 (Z8) disrupted KK-LC-1-FAT1 protein-protein interactions and prevented FAT1 degradation thus activated Hippo signaling pathway.

**a:** Drug susceptibility test of Z8 in different cell lines; data are presented as mean $\pm$ SEM from three biologically independent experiments, with IC<sub>50</sub> as follows: 9.5 (7.52-12.23, 95% CI)  $\mu$ M for MDA-MB-231, 12.31 (7.86-24.04, 95% CI)  $\mu$ M for MDA-MB-468 and 45.90 (26.36-193.6, 95% CI)  $\mu$ M for MCF7. IC<sub>50</sub> was estimated using non-linear fitting method.

**b:** Drug susceptibility test of Z8 in *KK-LC-1*<sup>-/-</sup> MDA-MB-231 cells and *KK-LC-1*<sup>-/-</sup> MDA-MB-468 cells; data are presented as mean $\pm$ SEM from three biologically independent experiments.

**c:** Drug susceptibility test of Z8 combined with docetaxel on docetaxel-resistant MDA-MB-231 cells; data are presented as mean $\pm$ SEM from three biologically independent experiments and CI<1.0 means synergistic effect which was calculated by Compusyn software.

**d:** Degradation of FAT1 was reduced by treatment of MDA-MB-468 cells with 5  $\mu$ M Z8 compared to DMSO, this experiment was performed 3 times independently with similar results.

**e:** Co-immunoprecipitation of FAT1 and KK-LC-1 was reduced by treatment of MDA-MB-468 cells with 5  $\mu$ M Z8 compared to DMSO, this experiment was performed 3 times independently with similar results.

**f:** Western blotting showing FAT1, MST1, pMST1, LATS1, pLATS1, YAP1, and pYAP1 protein levels in MDA-MB-468 cells treated with different concentrations of Z8 or DMSO; data are presented as mean $\pm$ SD from three biologically independent experiments, statistical significance was determined using Student's t test and was two sided.

**g,h:** Immunofluorescence showing the distribution of YAP1 protein in MDA-MB-231/468 cells when treated with DMSO or 5  $\mu$ M Z8, red scale bars indicate 10 $\mu$ m; data are presented as mean $\pm$ SD from 10 randomized views, this experiment was performed 3 times independently with similar results, statistical significance was determined using

Student's t test and was two sided.

Source data are provided in the Source Data file.



# Supplementary Fig 11

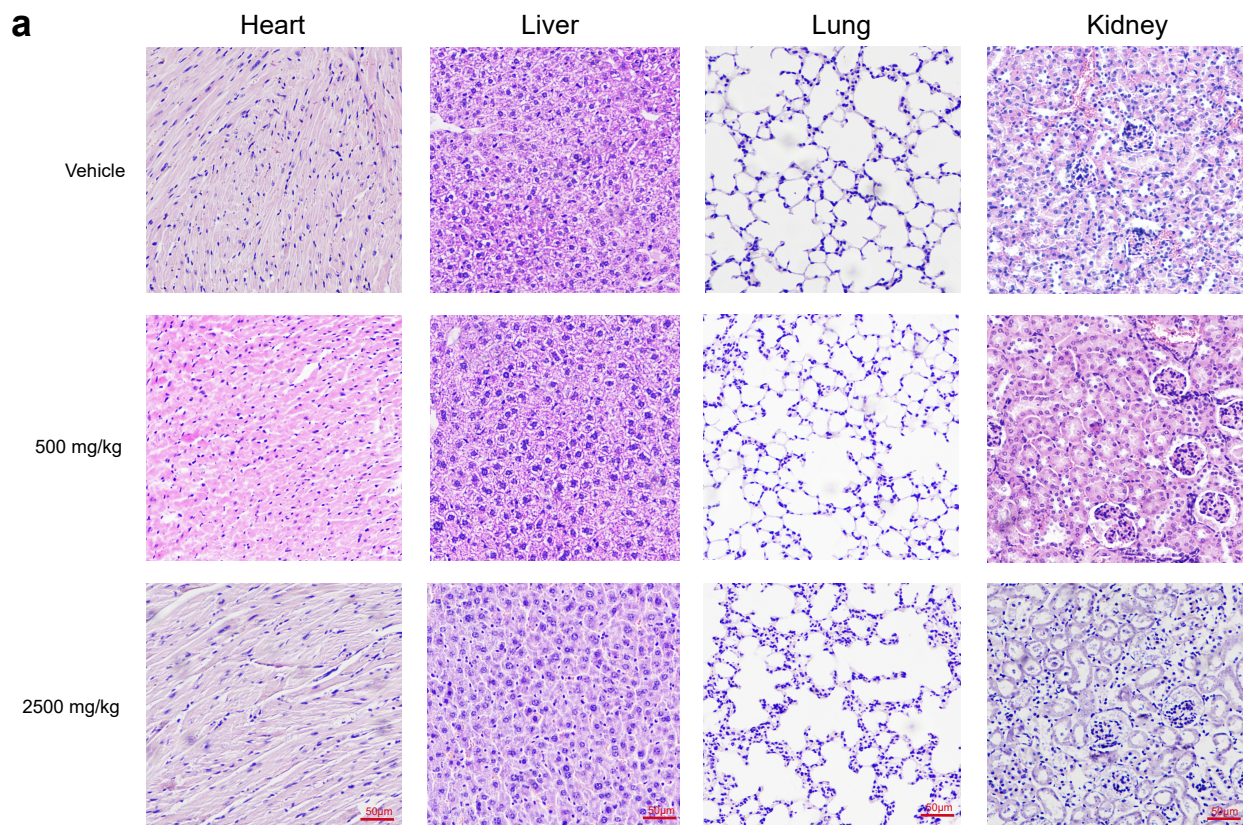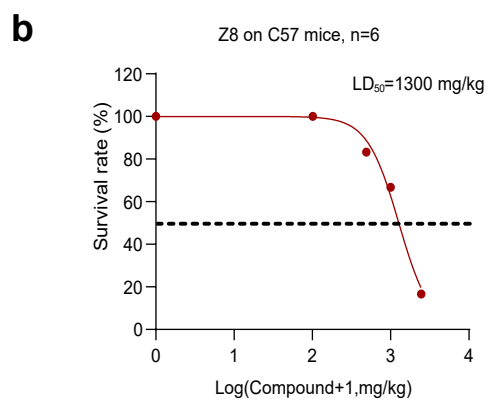



### **Supplementary Fig 11**

Small molecule compound Z8 displays favourable safety profile.

**a:** H&E staining of tissues from mice treated with different concentrations of Z8 in an acute toxicity test, this experiment was performed 3 times independently with similar results.

**b:** LD<sub>50</sub> of Z8 tested on C57 mice, n=6 mice for each group, LD<sub>50</sub> was estimated using non-linear fitting method.

Source data are provided in the Source Data file.

### Supplementary Table 1

Statistical results of limiting dilution assay using ALDH<sup>+</sup> MDA-MB-231 cells and ALDH<sup>-</sup> MDA-MB-231 cells upon *KK-LC-1* knockdown. (Statistical significance was determined using t-statistic approach and was one sided)

| Cell number                | ALDH <sup>+</sup> cells |                        |                        | ALDH <sup>-</sup> cells   |                           |                           |
|----------------------------|-------------------------|------------------------|------------------------|---------------------------|---------------------------|---------------------------|
|                            | NC                      | sh- <i>KK-LC-1</i> #1  | sh- <i>KK-LC-1</i> #2  | NC                        | sh- <i>KK-LC-1</i> #1     | sh- <i>KK-LC-1</i> #2     |
| 1000 cells                 | 24/24                   | 17/24                  | 16/24                  | 2/24                      | 2/24                      | 2/24                      |
| 100 cells                  | 52/60                   | 32/60                  | 35/60                  | 6/60                      | 7/60                      | 5/60                      |
| 10 cells                   | 34/60                   | 11/60                  | 13/60                  | 1/60                      | 0/60                      | 1/60                      |
| Sphere formation frequency | 1/31<br>(1/28-1/41)     | 1/267<br>(1/185-1/383) | 1/327<br>(1/227-1/472) | 1/3657<br>(1/1787-1/7484) | 1/3244<br>(1/1645-1/6400) | 1/3662<br>(1/1789-1/7499) |
| <i>P</i> -value            |                         | <i>P</i> <0.001        | <i>P</i> <0.001        |                           | <i>P</i> =0.805           | <i>P</i> =0.998           |

**Supplementary Table 2**

Statistical results of limiting dilution assay using ALDH<sup>+</sup> MDA-MB-231 cells upon *KK-LC-1* knockdown. (Statistical significance was determined using t-statistic approach and was one sided)

| Cell number                      | sh-NC                    | sh- <i>KK-LC-1</i> #1       |
|----------------------------------|--------------------------|-----------------------------|
| 2×10 <sup>4</sup> cells          | 6/6                      | 3/6                         |
| 5×10 <sup>3</sup> cells          | 5/6                      | 2/6                         |
| 2×10 <sup>3</sup> cells          | 4/6                      | 1/6                         |
| 500 cells                        | 4/6                      | 0/6                         |
| Tumor initiating frequency (TIC) | 1/1426<br>(1/733-1/2774) | 1/20878<br>(1/9015-1/48354) |
| <i>P</i> -value                  |                          | <i>P</i> < 0.001            |

**Supplementary Table 3**

Statistical results of limiting dilution assay using ALDH<sup>+</sup> MDA-MB-231 cells and ALDH<sup>-</sup> MDA-MB-231 cells upon cultured with small molecule compound Z8. (Statistical significance was determined using t-statistic approach and was one sided)

| Cell number                | ALDH <sup>+</sup> cells |                 | ALDH <sup>-</sup> cells |                 |
|----------------------------|-------------------------|-----------------|-------------------------|-----------------|
|                            | DMSO                    | 5 $\mu$ M Z8    | NC                      | 5 $\mu$ M Z8    |
| 1000 cells                 | 23/24                   | 16/24           | 2/24                    | 2/24            |
| 100 cells                  | 50/60                   | 34/60           | 5/60                    | 6/60            |
| 10 cells                   | 30/60                   | 12/60           | 1/60                    | 0/60            |
| Sphere formation frequency | 1/52                    | 1/269           | 1/3663                  | 1/3657          |
|                            | (1/40-1/70)             | (1/187-1/387)   | (1/1789-1/7500)         | (1/1787-1/7484) |
| <i>P</i> -value            |                         | <i>P</i> <0.001 |                         | <i>P</i> =0.998 |

**Supplementary Table 4**

Demographic characteristics of patients with TNBC stratified by KK-LC-1 expression level. (Statistical significance was determined using chi-squared test and was one sided)

| Clinical features | KK-LC-1 expression<br>(Grade 1, 2) (%) | KK-LC-1 expression<br>(Grade 3, 4) (%) | P-value |
|-------------------|----------------------------------------|----------------------------------------|---------|
| Patient number    | 87 (60.4)                              | 57 (39.6)                              | -       |
| Age               |                                        |                                        | >0.999  |
| ≤51               | 48 (55.2)                              | 31 (54.3)                              |         |
| >51               | 39 (44.8)                              | 26 (45.6)                              |         |
| T stage           |                                        |                                        | 0.0009  |
| 1                 | 49 (56.3)                              | 21 (36.8)                              |         |
| 2                 | 32 (36.8)                              | 19 (33.3)                              |         |
| 3                 | 6 (6.9)                                | 17 (29.8)                              |         |
| N stage           |                                        |                                        | <0.0001 |
| 0                 | 45 (51.7)                              | 8 (14.0)                               |         |
| 1                 | 23 (26.4)                              | 19 (33.3)                              |         |
| 2                 | 14 (16.1)                              | 18 (31.6)                              |         |
| 3                 | 5 (5.8)                                | 12 (21.1)                              |         |
| Menopausal status |                                        |                                        | 0.5685  |
| Yes               | 34 (39.1)                              | 25 (43.9)                              |         |
| No                | 53 (60.9)                              | 32 (56.1)                              |         |

**Supplementary Table 5**

Antibody information

| Antibody                                            | Dilution     | Application | Cat number   | Manufacturer   |
|-----------------------------------------------------|--------------|-------------|--------------|----------------|
| KK-LC-1                                             | 1:600        | WB, IHC     | 25708-1-AP   | Proteintech    |
| KK-LC-1                                             | 1:200        | IP          | KKLC1-121AP  | FabGennix      |
| FAT1                                                | 1:200/1:1000 | IP, WB      | NBP2-32274   | Novus          |
| FAT1                                                | 1:1000       | IHC         | Ab198892     | Abcam          |
| ALDH1A1                                             | 1:500        | IHC, IF, WB | 15910-1-AP   | Proteintech    |
| SOX2                                                | 1:1000       | WB, IF      | 20118-1-AP   | Proteintech    |
| OCT4                                                | 1:1000       | WB          | 11263-1-AP   | Proteintech    |
| NANOG                                               | 1:1000       | WB          | 14295-1-AP   | Proteintech    |
| MST1                                                | 1:1000       | WB          | 22245-1-AP   | Proteintech    |
| pMST1                                               | 1:1000       | WB          | 80093-1-RR   | Proteintech    |
| LATS1                                               | 1:1000       | WB          | 17049-1-AP   | Proteintech    |
| pLATS1                                              | 1:1000       | WB          | AP0904       | Abclonal       |
| YAP1                                                | 1:1000       | WB, IF, IHC | 13584-1-AP   | Proteintech    |
| pYAP1                                               | 1:1000       | WB          | AP0489       | Abclonal       |
| GAPDH                                               | 1:5000       | WB          | 10494-1-AP   | Proteintech    |
| HSP90                                               | 1:5000       | WB          | 60318-1-Ig   | Proteintech    |
| Alexa Fluor 488-<br>(green) conjugated<br>secondary | 1:400        | IF          | ab150077     | Abcam          |
| Alexa Fluor 594-<br>(red) conjugated<br>secondary   | 1:400        | IF          | ab150080     | Abcam          |
| CD44                                                | 1:500        | FC          | 12211-MM02-A | SinoBiological |
| CD24                                                | 1:100        | FC          | 130-112-656  | Miltenyi       |

**Supplementary Table 6**

Primer sequence for qRT-PCR

| Gene           | Forward sequence             | Reverse sequence              |
|----------------|------------------------------|-------------------------------|
| <i>KK-LC-1</i> | GAGCAGCATTCTGTGTGCCT         | CCCGAGAGAGGTCGTAGACT<br>G     |
| <i>MMP1</i>    | AAAATTACACGCCAGATTTG<br>CC   | GGTGTGACATTACTCCAGAG<br>TTG   |
| <i>FAT1</i>    | CCTTCCAACAGCCACATCCA<br>CTAC | TTGAACCGTGAGCGTGTAAC<br>CTG   |
| <i>SOX2</i>    | GTATCAGGAGTTGTCAAGGC<br>AGAG | TCCTAGTCTTAAAGAGGCAG<br>CAAAC |
| <i>OCT4</i>    | GTGGAGGAAGCTGACAACA<br>A     | ATTCTCCAGGTTGCCTCTCA          |
| <i>NANOG</i>   | CCTGTGATTTGTGGGCCTG          | GACAGTCTCCGTGTGAGGCA<br>T     |
| <i>ALDH1A1</i> | GCACGCCAGACTTACCTGTC         | CCTCCTCAGTTGCAGGATTA<br>AAG   |
| <i>GAPDH</i>   | GGAGCGAGATCCCTCCAAA<br>AT    | GGCTGTTGTCATACTTCTCA<br>TGG   |
